# Supplementary material
Source: PubMed Central journal article supplement (PMC4829461)
Supplement: NIHMS751187-supplement-03.pdf [file NIHMS751187-supplement-03.pdf]

age and mother's HIV-status. Children born to HIV-infected mothers had a higher prevalence of TST positivity in the 24-35 month age-category ( $p=0.013$ ) and the 36-60 month age group ( $p=0.001$ ) compared to the children born to HIV-uninfected mothers in the same age-group. A positive TST is defined as induration  $\geq 10$ mm.

**Figure 2: Quantiferon Gold-In-Tube (QFT) and Tuberculin Skin (TST) positivity among children  $\leq 60$  months, using different definitions for TST cut offs for positivity.**

\*age-specific cut-off proposed by Chan et al.<sup>28</sup> (positive TST defined as  $\geq 21$ mm from 0-1 years,  $\geq 18$ mm from age 2-3 years, and  $\geq 13$ mm from 4-5 years).

## **SUPPLEMENTAL DIGITAL CONTENT LEGENDS**

Figure, Supplementary Digital Content 1: Study Schema

Table, Supplementary Digital Content 2: Demographics of Study Participants
